# Supplementary material for: Lineage specific extracellular vesicle-associated protein biomarkers for the early detection of high grade serous ovarian cancer
Source: PubMed Central journal article supplement (PMC10603107; doi:10.1038/s41598-023-44050-5), 2023-10-26
Supplement: 41598_2023_44050_MOESM7_ESM.pdf [file 41598_2023_44050_MOESM7_ESM.pdf]

## Supplementary Table 1

75 transmembrane proteins found in FT/HGSOC core proteome; ranked according to fold change

9 proteins were excluded because they are considered common EV proteins (highlighted in blue, see text for details)

46 proteins selected for further analysis are highlighted in gold.

IGHM and ADAM10 were excluded (highlighted in red, see text for details)

| UniProt ID | Gene ID | Detected in top 100<br>Common EV proteins in<br>ExoCarta/Vesiclepedia | log2 FC (HGSOC/FT) | -log10 (p value) | Detected in<br>Reference # 53 |
|------------|---------|-----------------------------------------------------------------------|--------------------|------------------|-------------------------------|
| P07099     | EPHX1   | No                                                                    | 1.35               | 1.25             | No                            |
| P16422     | EPCAM   | No                                                                    | 1.30               | 0.75             | Yes                           |
| P05106     | ITGB3   | No                                                                    | 1.22               | 0.76             | No                            |
| P15151     | PVR     | No                                                                    | 1.16               | 1.53             | Yes                           |
| P35613     | BSG     | Yes                                                                   | 1.07               | 0.44             | NA                            |
| Q92896     | GLG1    | No                                                                    | 0.80               | 0.89             | Yes                           |
| P23229     | ITGA6   | Yes                                                                   | 0.74               | 0.69             | NA                            |
| O00299     | CLIC1   | Yes                                                                   | 0.73               | 1.20             | NA                            |
| Q9P2B2     | PTGFRN  | Yes                                                                   | 0.73               | 0.66             | NA                            |
| P02730     | SLC4A1  | No                                                                    | 0.68               | 0.41             | Yes                           |
| P08648     | ITGA5   | No                                                                    | 0.61               | 0.27             | Yes                           |
| Q9UBG0     | MRC2    | No                                                                    | 0.59               | 0.41             | Yes                           |
| Q96NY7     | CLIC6   | No                                                                    | 0.54               | 0.35             | No                            |
| O00468     | AGRN    | No                                                                    | 0.53               | 0.36             | No                            |
| P15144     | ANPEP   | No                                                                    | 0.48               | 0.38             | Yes                           |
| P08514     | ITGA2B  | No                                                                    | 0.42               | 0.18             | Yes                           |
| O43490     | PROM1   | No                                                                    | 0.35               | 0.21             | Yes                           |
| P16435     | POR     | No                                                                    | 0.33               | 0.46             | No                            |
| Q9BSJ8     | ESYT1   | No                                                                    | 0.32               | 0.30             | No                            |
| P00533     | EGFR    | No                                                                    | 0.13               | 0.06             | Yes                           |
| P08575     | PTPRC   | No                                                                    | 0.11               | 0.06             | Yes                           |
| O15031     | PLXNB2  | No                                                                    | 0.11               | 0.09             | Yes                           |
| Q5T4S7     | UBR4    | No                                                                    | 0.11               | 0.11             | No                            |
| P17301     | ITGA2   | No                                                                    | 0.09               | 0.04             | Yes                           |
| O60488     | ACSL4   | No                                                                    | 0.09               | 0.05             | No                            |

|        |         |     |       |      |     |
|--------|---------|-----|-------|------|-----|
| Q16853 | AOC3    | No  | 0.07  | 0.03 | Yes |
| Q07954 | LRP1    | No  | 0.05  | 0.03 | Yes |
| P01871 | IGHM    | No  | -0.02 | 0.01 | Yes |
| P11279 | LAMP1   | No  | -0.03 | 0.01 | No  |
| P05187 | ALPP    | No  | -0.05 | 0.02 | No  |
| Q12797 | ASPH    | No  | -0.05 | 0.03 | No  |
| Q12846 | STX4    | No  | -0.05 | 0.05 | Yes |
| Q13308 | PTK7    | No  | -0.07 | 0.04 | Yes |
| Q969P0 | IGSF8   | No  | -0.07 | 0.03 | Yes |
| P33121 | ACSL1   | No  | -0.07 | 0.03 | No  |
| P05023 | ATP1A1  | Yes | -0.08 | 0.04 | NA  |
| O00264 | PGRMC1  | No  | -0.10 | 0.07 | No  |
| Q6DD88 | ATL3    | No  | -0.10 | 0.06 | No  |
| P20020 | ATP2B1  | No  | -0.19 | 0.14 | Yes |
| P49755 | TMED10  | No  | -0.19 | 0.18 | No  |
| Q14672 | ADAM10  | No  | -0.22 | 0.11 | Yes |
| P23634 | ATP2B4  | No  | -0.27 | 0.30 | Yes |
| Q10589 | BST2    | No  | -0.29 | 0.18 | Yes |
| P22897 | MRC1    | No  | -0.29 | 0.24 | No  |
| Q9NZM1 | MYOF    | No  | -0.30 | 0.32 | Yes |
| P51572 | BCAP31  | No  | -0.31 | 0.37 | No  |
| P08069 | IGF1R   | No  | -0.33 | 0.20 | Yes |
| P05141 | SLC25A5 | No  | -0.34 | 0.41 | No  |
| P02786 | TFRC    | Yes | -0.40 | 0.21 | NA  |
| P36269 | GGT5    | No  | -0.43 | 0.49 | Yes |
| Q9HDC9 | APMAP   | No  | -0.44 | 0.50 | Yes |
| Q13740 | ALCAM   | No  | -0.45 | 0.78 | Yes |
| P08195 | SLC3A2  | Yes | -0.48 | 0.22 | NA  |
| Q6UVK1 | CSPG4   | No  | -0.49 | 0.78 | Yes |
| O00592 | PODXL   | No  | -0.60 | 0.63 | NA  |
| P11717 | IGF2R   | No  | -0.62 | 0.27 | NA  |
| Q6UXG2 | ELAPOR1 | No  | -0.66 | 0.45 | NA  |
| P06756 | ITGAV   | No  | -0.70 | 0.69 | NA  |
| Q9Y696 | CLIC4   | No  | -0.72 | 1.02 | NA  |

|        |          |     |       |      |    |
|--------|----------|-----|-------|------|----|
| Q08722 | CD47     | No  | -0.77 | 1.12 | NA |
| P50851 | LRBA     | No  | -0.77 | 1.35 | NA |
| P49257 | LMAN1    | No  | -0.79 | 1.31 | NA |
| P07357 | C8A      | No  | -0.81 | 0.95 | NA |
| P16615 | ATP2A2   | No  | -0.85 | 2.45 | NA |
| P27824 | CANX     | No  | -0.87 | 2.31 | NA |
| P54289 | CACNA2D1 | No  | -0.98 | 1.25 | NA |
| P04843 | RPN1     | No  | -1.00 | 1.25 | NA |
| Q16647 | PTGIS    | No  | -1.16 | 1.25 | NA |
| Q9Y639 | NPTN     | No  | -1.23 | 2.12 | NA |
| P21926 | CD9      | Yes | -1.39 | 1.52 | NA |
| P02748 | C9       | No  | -1.48 | 2.31 | NA |
| P05556 | ITGB1    | Yes | -1.53 | 1.67 | NA |
| P18084 | ITGB5    | No  | -1.78 | 3.23 | NA |
| P26006 | ITGA3    | No  | -1.89 | 2.26 | NA |
| P29317 | EPHA2    | No  | -2.09 | 2.10 | NA |

## Supplementary Table 2

Area under the curve values for early stage and late stage ovarian cancer (OC) patient samples compared to healthy controls (HC) on the ExoProfile chip.

| Exo-Protein | HC vs Early Stage OC<br>AUC | HC vs Late Stage OC<br>AUC |
|-------------|-----------------------------|----------------------------|
| IGSF8       | 0.820                       | 0.970                      |
| ITGA2       | 0.830                       | 0.940                      |
| MYOF        | 0.770                       | 0.930                      |
| ACSL4       | 0.920                       | 0.910                      |
| ITGB3       | 1.000                       | 0.960                      |
| ITGA5       | 0.970                       | 0.930                      |
| FOLR1       | 0.970                       | 0.880                      |

### Supplementary Table 3

Statistical analysis for each exo-protein biomarker on the ExoProfile chip for the 10 ovarian cancer and 20 healthy controls plasma within the specificity sample set.

| Exo-Protein                         | AUC   | Standard | CI_lower | CI_upper | p-value-2t            | Sensitivity at 99.8% Specificity | PPV   |
|-------------------------------------|-------|----------|----------|----------|-----------------------|----------------------------------|-------|
| IGSF8                               | 0.985 | 0.018    | 0.949    | 1        | $1.09 \times 10^{-4}$ | 0.7                              | 0.123 |
| ITGA2                               | 1     | NA       | NA       | NA       | $6.00 \times 10^{-6}$ | 1                                | 0.167 |
| MYOF                                | 0.98  | 0.023    | 0.935    | 1        | $1.33 \times 10^{-5}$ | 0.6                              | 0.107 |
| ACSL4                               | 0.995 | 0.009    | 0.978    | 1        | $7.34 \times 10^{-6}$ | 0.9                              | 0.153 |
| ITGB3                               | 0.985 | 0.018    | 0.95     | 1        | $1.09 \times 10^{-5}$ | 0.9                              | 0.153 |
| ITGA5                               | 0.99  | 0.013    | 0.964    | 1        | $8.96 \times 10^{-6}$ | 0.9                              | 0.153 |
| FOLR1                               | 0.995 | 0.009    | 0.978    | 1        | $7.34 \times 10^{-6}$ | 0.9                              | 0.153 |
| Linear Combination of IGSF8 & ITGA5 | 0.995 | 0.009    | 0.978    | 1        | $7.34 \times 10^{-6}$ | 0.9                              | 0.138 |

## Supplementary Table 4

Antibodies used in this study.

| Antibodies                                               | Manufacturer      | Catalog #    | Dilution | Application     |
|----------------------------------------------------------|-------------------|--------------|----------|-----------------|
| ACSL4                                                    | Novus Biologicals | NBP2-16401   | 1:50     | Wes             |
|                                                          |                   |              | 1:200    | IHC             |
| ACSL4                                                    | Novus Biologicals | NB300-861    | 1:500    | ExoProfile chip |
| CA-125                                                   | Abcam             | ab274402     | NA       | ELISA           |
| CD81                                                     | Proteintech       | 66866-1-Ig   | 1:100    | Wes             |
| CD81                                                     | Ancell            | 302-820      | 1:5      | ExoProfile chip |
| Flotillin-1                                              | Santa Cruz        | sc-74566     | 1:50     | Wes             |
| FOLR1                                                    | R&D systems       | AF5646       | 1:500    | ExoProfile chip |
| FOLR1                                                    | Invitrogen        | PA5-24186    | 1:400    | IHC             |
| IGSF8                                                    | Novus Biologicals | AF3117       | 1:20     | Wes             |
| IGSF8                                                    | R&D systems       | MAB31171-100 | 1:100    | ExoProfile chip |
| IGSF8                                                    | Invitrogen        | PA5-52875    | 1:100    | IHC             |
| ITGA2                                                    | Novus Biologicals | NBP2-76483   | 1:20     | Wes             |
|                                                          |                   |              | 1:200    | IHC             |
| ITGA2                                                    | Novus Biologicals | NBP3-03851   | 1:100    | ExoProfile chip |
| ITGA5                                                    | Novus Biologicals | NBP1-84576   | 1:50     | Wes             |
|                                                          |                   |              | 1:200    | IHC             |
| ITGA5                                                    | R&D systems       | AF1864       | 1:500    | ExoProfile chip |
| ITGB3                                                    | Novus Biologicals | NBP2-67416   | 1:50     | Wes             |
|                                                          |                   |              | 1:50     | IHC             |
| ITGB3                                                    | R&D systems       | AF2266       | 1:500    | ExoProfile chip |
| MYOF                                                     | Novus Biologicals | NBP1-84694   | 1:20     | Wes             |
|                                                          |                   |              | 1:100    | ExoProfile chip |
|                                                          |                   |              | 1:200    | IHC             |
| p53                                                      | Dako              | IR616        | NA       | IHC             |
| STX4                                                     | Novus Biologicals | MAB7894-SP   | 1:20     | Wes             |
| STX4                                                     | Invitrogen        | PA5-51560    | 1:300    | IHC             |
| Donkey anti-Goat IgG (H+L) secondary antibody (biotin)   | Novus Biologicals | NBP1-74820   | 1:500    | ExoProfile chip |
| Donkey anti-Rabbit IgG (H+L) secondary antibody (biotin) | Novus Biologicals | NBP1-75288   | 1:500    | ExoProfile chip |

## Supplementary Table 5

List of monotone markers.

| Accession | Gene Name | AUC     | p-value | AUC-0.5 +0.5 | logFC    |
|-----------|-----------|---------|---------|--------------|----------|
| P63010    | AP2B1     | 0.04233 | 0.00010 | 0.95767      | -1.68695 |
| P23528    | CFL1      | 0.10053 | 0.00069 | 0.89947      | -1.87569 |
| P63261    | ACTG1     | 0.12169 | 0.00131 | 0.87831      | -2.68205 |
| P11940    | PABPC1    | 0.12169 | 0.00131 | 0.87831      | -1.92556 |
| P31946    | YWHAB     | 0.13228 | 0.00179 | 0.86772      | -1.14743 |
| P29692    | EEF1D     | 0.14286 | 0.00243 | 0.85714      | -2.72388 |
| P30481    | HLA-B     | 0.14286 | 0.00243 | 0.85714      | -1.69459 |
| Q99439    | CNN2      | 0.14286 | 0.00243 | 0.85714      | -2.03771 |
| Q00341    | HDLBP     | 0.14815 | 0.00282 | 0.85185      | -1.20565 |
| P02649    | APOE      | 0.15344 | 0.00326 | 0.84656      | -1.33752 |
| P61981    | YWHAG     | 0.15873 | 0.00377 | 0.84127      | -1.25107 |
| P20339    | RAB5A     | 0.15873 | 0.00377 | 0.84127      | -1.29313 |
| P51148    | RAB5C     | 0.16931 | 0.00502 | 0.83069      | -1.49546 |
| P40261    | NNMT      | 0.17460 | 0.00577 | 0.82540      | -2.65944 |
| Q15582    | TGFBI     | 0.17989 | 0.00662 | 0.82011      | -2.18810 |
| Q99829    | CPNE1     | 0.18519 | 0.00758 | 0.81481      | -1.99417 |
| P63313    | TMSB10    | 0.18519 | 0.00758 | 0.81481      | -1.27912 |
| P26006    | ITGA3     | 0.82011 | 0.00662 | 0.82011      | 1.34115  |
| P18084    | ITGB5     | 0.82540 | 0.00577 | 0.82540      | 2.56944  |
| P04216    | THY1      | 0.83069 | 0.00502 | 0.83069      | 1.32160  |
| P02768    | ALB       | 0.85185 | 0.00282 | 0.85185      | 1.04041  |
| Q6UXG2    | ELAPOR1   | 0.85185 | 0.00282 | 0.85185      | -0.60241 |
| Q8TE73    | DNAH5     | 0.86243 | 0.00209 | 0.86243      | 1.62714  |
| Q9Y639    | NPTN      | 0.87302 | 0.00154 | 0.87302      | 1.63668  |
| P04217    | A1BG      | 0.88889 | 0.00095 | 0.88889      | 1.26477  |
| Q99798    | ACO2      | 0.93651 | 0.00021 | 0.93651      | 1.29714  |
| O43854    | EDIL3     | 0.98413 | 0.00004 | 0.98413      | 4.69203  |

List of non-monotone markers

| Accession | Gene Name | AUC     | p-value | AUC-0.5 +0.5 | logFC    |
|-----------|-----------|---------|---------|--------------|----------|
| P68366    | TUBA4A    | 0.62434 | 0.29792 | 0.62434      | 1.79590  |
| P46781    | RPS9      | 0.63492 | 0.25788 | 0.63492      | 1.24112  |
| Q9NTK5    | OLA1      | 0.40212 | 0.41529 | 0.59788      | -0.73955 |
| P31943    | HNRNPH1   | 0.45503 | 0.71731 | 0.54497      | -0.81772 |
| P34913    | EPHX2     | 0.59788 | 0.41529 | 0.59788      | 0.52877  |
| Q06787    | FMR1      | 0.58201 | 0.49724 | 0.58201      | -0.05896 |
| O43866    | CD5L      | 0.58201 | 0.49724 | 0.58201      | 0.42504  |
| P61769    | B2M       | 0.45503 | 0.71731 | 0.54497      | -0.94536 |
| P61158    | ACTR3     | 0.56085 | 0.61861 | 0.56085      | 0.35186  |
| Q9BTU6    | PI4K2A    | 0.50265 | 1.00000 | 0.50265      | 1.49655  |
| P00338    | LDHA      | 0.42328 | 0.52635 | 0.57672      | -1.21965 |
| Q15008    | PSMD6     | 0.37566 | 0.29792 | 0.62434      | -0.27057 |
| P62280    | RPS11     | 0.62434 | 0.29792 | 0.62434      | 0.88494  |
| P62191    | PSMC1     | 0.37037 | 0.27741 | 0.62963      | -0.36233 |
| P50990    | CCT8      | 0.53968 | 0.75140 | 0.53968      | 0.11108  |
| Q92878    | RAD50     | 0.49735 | 1.00000 | 0.50265      | -0.35020 |

## Supplementary Table 6

List of 324 unique proteins in HGSOC samples.

| UniProt ID | Gene Name | UniProt ID | Gene Name | UniProt ID | Gene Name | UniProt ID | Gene Name |
|------------|-----------|------------|-----------|------------|-----------|------------|-----------|
| P63267     | ACTG2     | Q09028     | RBBP4     | Q96F85     | CNRIP1    | Q9H269     | VPS16     |
| P00739     | HPR       | P01824     | IGHV4-39  | P05771     | PRKCB     | Q9NR50     | EIF2B3    |
| Q5QNW6     | H2BC18    | Q13547     | HDAC1     | Q6IAA8     | LAMTOR1   | P55011     | SLC12A2   |
| Q9BTM1     | H2AJ      | Q10567     | AP1B1     | Q9UI12     | ATP6V1H   | Q96M27     | PRRC1     |
| P05455     | SSB       | P62841     | RPS15     | P09661     | SNRPA1    | P26368     | U2AF2     |
| P02042     | HBD       | P60228     | EIF3E     | Q92817     | EVPL      | Q13188     | STK3      |
| P16104     | H2AX      | P30044     | PRDX5     | Q6IBS0     | TWF2      | O43813     | LANCL1    |
| Q8IUE6     | H2AC21    | O75165     | DNAJC13   | P46976     | GYG1      | P13693     | TPT1      |
| P28161     | GSTM2     | O75351     | VPS4B     | P55769     | SNU13     | O95490     | ADGRL2    |
| Q7Z6Z7     | HUWE1     | Q92743     | HTRA1     | P20160     | AZU1      | Q9NVP1     | DDX18     |
| P53618     | COPB1     | P16284     | PECAM1    | Q12972     | PPP1R8    | O43148     | RNMT      |
| Q15366     | PCBP2     | Q15485     | FCN2      | P08621     | SNRNP70   | P50502     | ST13      |
| P32969     | RPL9      | A0A0B4J1X5 | IGHV3-74  | Q92485     | SMPDL3B   | P30084     | ECHS1     |
| P53675     | CLTCL1    | Q9NQW7     | XPNPEP1   | Q9Y6E0     | STK24     | Q05655     | PRKCD     |
| Q9ULA0     | DNPEP     | O94776     | MTA2      | Q6YP21     | KYAT3     | Q9BVG4     | PBDC1     |
| Q12906     | ILF3      | Q9H3U1     | UNC45A    | P36405     | ARL3      | P29590     | PML       |
| Q14103     | HNRNPD    | P47755     | CAPZA2    | P36404     | ARL2      | Q9GZZ1     | NAA50     |
| P30043     | BLVRB     | Q86W11     | PKHD1L1   | P01817     | IGHV2-5   | P61764     | STXBP1    |
| Q07065     | CKAP4     | Q6XQN6     | NAPRT     | Q14376     | GALE      | P46926     | GNPDA1    |
| P55795     | HNRNPH2   | P20851     | C4BPB     | P12821     | ACE       | P60983     | GMFB      |
| P11217     | PYGM      | Q9BWD1     | ACAT2     | P13797     | PLS3      | O60825     | PFKFB2    |
| P40763     | STAT3     | O95671     | ASMTL     | P06702     | S100A9    | P49207     | RPL34     |
| Q9NQR4     | NIT2      | P41226     | UBA7      | Q8TAT6     | NPLOC4    | Q99816     | TSG101    |
| P01833     | PIGR      | Q8WVM8     | SCFD1     | O76003     | GLRX3     | P61923     | COPZ1     |
| O43865     | AHCYL1    | P26196     | DDX6      | Q15185     | PTGES3    | Q13107     | USP4      |
| P27695     | APEX1     | P42229     | STAT5A    | Q9UI30     | TRMT112   | Q9P0K7     | RAI14     |
| P67809     | YBX1      | O14828     | SCAMP3    | P60866     | RPS20     | P10599     | TXN       |
| O94874     | UFL1      | Q15477     | SKIV2L    | Q9UHG3     | PCYOX1    | O75915     | ARL6IP5   |
| Q9Y285     | FARSA     | P23921     | RRM1      | P13796     | LCP1      | P07093     | SERPINE2  |
| Q9UBQ0     | VPS29     | Q02880     | TOP2B     | P45880     | VDAC2     | Q9NZL9     | MAT2B     |
| P31689     | DNAJA1    | P06730     | EIF4E     | Q5VW32     | BROX      | Q9UEY8     | ADD3      |



|        |          |            |          |            |          |            |          |
|--------|----------|------------|----------|------------|----------|------------|----------|
| Q9Y5B9 | SUPT16H  | Q15042     | RAB3GAP1 | Q15370     | ELOB     | Q96JH7     | VCPIP1   |
| P19971 | TYMP     | P40121     | CAPG     | Q16787     | LAMA3    | O60493     | SNX3     |
| P51888 | PRELP    | Q7Z4W1     | DCXR     | A0A087WW87 | IGKV2-40 | P00451     | F8       |
| Q07960 | ARHGAP1  | P62314     | SNRPD1   | P09972     | ALDOC    | Q9BS26     | ERP44    |
| P62140 | PPP1CB   | P60891     | PRPS1    | P09758     | TACSTD2  | Q15813     | TBCE     |
| P26599 | PTBP1    | P61201     | COPS2    | O15247     | CLIC2    | P04080     | CSTB     |
| Q9P258 | RCC2     | A0A0C4DH38 | IGHV5-51 | P62316     | SNRPD2   | A0A075B6J9 | IGLV2-18 |
| P08243 | ASNS     | P16050     | ALOX15   | Q7L1Q6     | BZW1     | Q9Y333     | LSM2     |
| Q7Z406 | MYH14    | O94903     | PLPBP    | P26447     | S100A4   | P62942     | FKBP1A   |
| P36543 | ATP6V1E1 | P09496     | CLTA     | Q8WXX5     | DNAJC9   | P00390     | GSR      |
| P30876 | POLR2B   | Q9HAV0     | GNB4     | Q3KQV9     | UAP1L1   | Q01581     | HMGCS1   |
| Q14914 | PTGR1    | P78386     | KRT85    | Q13464     | ROCK1    | P55039     | DRG2     |
| P09874 | PARP1    | P52943     | CRIP2    | Q9UKD2     | MRTO4    | Q9BTT0     | ANP32E   |
| Q96KP4 | CNDP2    | Q9UL46     | PSME2    | Q02252     | ALDH6A1  | Q14232     | EIF2B1   |
| O15372 | EIF3H    | P09104     | ENO2     | Q9BXR0     | QTRT1    | Q8N684     | CPSF7    |
| P26639 | TARS1    | Q99707     | MTR      | Q8NCA5     | FAM98A   | Q8WW22     | DNAJA4   |
| P51570 | GALK1    | Q9HB71     | CACYBP   | Q13177     | PAK2     | P62312     | LSM6     |
| Q15369 | ELOC     | O75832     | PSMD10   | Q9UBW5     | BIN2     | P61326     | MAGOH    |
| O15143 | ARPC1B   | Q14160     | SCRIB    | P42226     | STAT6    | P59665     | DEFA1    |
| P57737 | CORO7    | P02654     | APOC1    | P62318     | SNRPD3   | O00743     | PPP6C    |
| O43396 | TXNL1    | Q9UKG1     | APPL1    | Q13033     | STRN3    | O60343     | TBC1D4   |
| O00203 | AP3B1    | Q8N6C5     | IGSF1    | O00187     | MASP2    | Q13404     | UBE2V1   |
| O96019 | ACTL6A   | Q9NZA1     | CLIC5    | O95352     | ATG7     | O43291     | SPINT2   |
| O43681 | GET3     | Q96H79     | ZC3HAV1L | Q99575     | POP1     | P06454     | PTMA     |
| P50552 | VASP     | P40925     | MDH1     | P05362     | ICAM1    | Q9UNE7     | STUB1    |
| Q93009 | USP7     | P21281     | ATP6V1B2 | Q9Y2Q3     | GSTK1    | Q8N6H7     | ARFGAP2  |
| P31150 | GDI1     | P09471     | GNAO1    | P35052     | GPC1     | Q14767     | LTBP2    |
| P49721 | PSMB2    | P08240     | SRPRA    | P06276     | BCHE     | P98172     | EFNB1    |
| Q9NR99 | MXRA5    | P24928     | POLR2A   | P04632     | CAPNS1   | Q8WUW1     | BRK1     |
| P61221 | ABCE1    | P41240     | CSK      | Q8WXH0     | SYNE2    | Q92979     | EMG1     |
| O95865 | DDAH2    | P05107     | ITGB2    | O00194     | RAB27B   | O43617     | TRAPPC3  |
| Q13363 | CTBP1    | P22061     | PCMT1    | P43487     | RANBP1   | Q8TDY4     | ASAP3    |
| P80511 | S100A12  | P11388     | TOP2A    | P48556     | PSMD8    | P51151     | RAB9A    |
| P53999 | SUB1     | P05186     | ALPL     | Q9Y224     | RTRAF    | Q07021     | C1QBP    |

|        |          |        |        |        |         |        |          |
|--------|----------|--------|--------|--------|---------|--------|----------|
| P35270 | SPR      | Q14694 | USP10  | Q8N8N7 | PTGR2   | Q5HYI8 | RABL3    |
| Q9NRW1 | RAB6B    | O95810 | CAVIN2 | Q04323 | UBXN1   | Q6VY07 | PACS1    |
| P52907 | CAPZA1   | Q9Y6K5 | OAS3   | P48426 | PIP4K2A | O95239 | KIF4A    |
| P68402 | PAFAH1B2 | Q96QR8 | PURB   | P18031 | PTPN1   | Q96SB4 | SRPK1    |
| P30491 | HLA-B    | Q99447 | PCYT2  | Q9NP79 | VTA1    | Q969T7 | NT5C3B   |
| P11277 | SPTB     | O15400 | STX7   | Q92973 | TNPO1   | O00221 | NFKBIE   |
| P11215 | ITGAM    | Q9H3S7 | PTPN23 | Q9UL26 | RAB22A  | Q14444 | CAPRIN1  |
| P52788 | SMS      | P56199 | ITGA1  | Q8TEQ6 | GEMIN5  | P16112 | ACAN     |
| P52597 | HNRNPF   | P53367 | ARFIP1 | P35637 | FUS     | O14920 | IKBKB    |
| Q15046 | KARS1    | Q9NRW7 | VPS45  | P62714 | PPP2CB  | Q6ICL3 | TANGO2   |
| P30085 | CMPK1    | Q9BQS8 | FYCO1  | O95372 | LYPLA2  | Q5T7R7 | C1orf185 |
| P25205 | MCM3     | P20839 | IMPDH1 | Q2NL82 | TSR1    | P07477 | PRSS1    |
| P62829 | RPL23    | O94832 | MYO1D  | P18077 | RPL35A  | P10915 | HAPLN1   |
| P51610 | HCFC1    | P61026 | RAB10  | Q9Y624 | F11R    | Q14451 | GRB7     |
| P62888 | RPL30    | Q06203 | PPAT   | Q96S55 | WRNIP1  | Q5T8A7 | PPP1R26  |
| Q8NE71 | ABCF1    | Q6PGP7 | TTC37  | P15328 | FOLR1   | Q6ZVH7 | ESPNL    |
